# Supplementary material for: CircRNA_000203 enhances the expression of fibrosis-associated genes by derepressing targets of miR-26b-5p, Col1a2 and CTGF, in cardiac fibroblasts
Source: PubMed Central journal article supplement (PMC5228128; doi:10.1038/srep40342), 2017-01-12
Supplement: srep40342-s1.pdf [file srep40342-s1.pdf]

**CircRNA\_000203 enhances the expression of fibrosis-associated genes by derepressing targets of miR-26b-5p, Col1a2 and CTGF, in cardiac fibroblasts**

Chun-Mei Tang<sup>1,2,3\*</sup>, Ming Zhang<sup>2,\*</sup>, Lei Huang<sup>4\*</sup>, Zhi-qin Hu<sup>1,2,3\*</sup>, Jie-Ning Zhu<sup>1,2</sup>, Zhen Xiao<sup>2</sup>, Zhuo Zhang<sup>2</sup>, Qiu-xiong Lin<sup>1,2</sup>, Xi-Long Zheng<sup>5</sup>, Min-Yang<sup>1,2</sup>, Shu-Lin Wu<sup>1,2</sup>, Jian-Ding Cheng<sup>a,4</sup> and Zhi-Xin Shan<sup>a,1,2</sup>

<sup>1</sup> Guangdong Cardiovascular Institute, Guangdong Provincial Key Laboratory of Clinical Pharmacology, Guangzhou 510080, China

<sup>2</sup> Guangdong General Hospital, Guangdong Academy of Medical Sciences, Guangzhou 510080, China

<sup>3</sup> Southern Medical University, Guangzhou 510515, China

<sup>4</sup> The Libin Cardiovascular Institute of Alberta, Department of Biochemistry & Molecular Biology, The University of Calgary, Calgary, T2N 1N4, Canada

<sup>5</sup> Department of Forensic, Sun-Yat-sen University, Guangzhou 510275, China

<sup>a</sup>Email: chengjd@mail.sysu.edu.cn

<sup>a</sup>Email: zhixinshan@aliyun.com

\* These authors contributed equally to this work.

**Supplementary table 1 Primers used in real-time qRT-PCR**

| Gene           | Sequence (5'- 3')                                                                                                    | Product size<br>(bp) |
|----------------|----------------------------------------------------------------------------------------------------------------------|----------------------|
| Col1a2         | F, CTGGTCCTGTTGGAAGTCGT<br>R, CAGATGCACCTGTTTCTCCA                                                                   | 201                  |
| Col3a1         | F, CAATGTAAAGAAGTCTCTGAAG<br>R, CAAACAGGGCCAATGTCCAC                                                                 | 240                  |
| $\alpha$ -SMA  | F, CTGTGCTATGTCGCTCTGGA<br>R, ATAGGTGGTTTCGTGGATGC                                                                   | 192                  |
| CTGF           | F,GAAGCTGACCTGGAGGAAAA<br>R, ACTGGCAGAGTGGTGGTTCT                                                                    | 182                  |
| Myo9a          | F, TTTCTGGGATGACTGGCATT<br>R, GACTGGGTGTTGGAGAAAGC                                                                   | 191                  |
| circRNA_000203 | F, AAGAGAAGTACAGATTGCTTCA<br>R, CTCTTCTTTAACTTCTAATAATTC                                                             | 249                  |
| GAPDH          | F, CAAGAAGGTGGTGAAGCAGG<br>R, CCACCCTGTTGCTGTAGCC                                                                    | 200                  |
| miR-26b        | RT, GTCGTATCCAGTGCGTGTCGTGGAGTCGG<br>CAATTGCACTGGATACGACACCTATCC<br>F, TTCAAGTAATTCAGGATAGGT<br>R, GTGCGTGTCGTGGAGTC | 76                   |
| U6             | RT, GTCGTATCCAGTGCGTGTCGTGGAGT<br>CGGCAATTGCACTGGATACGAC<br>F, GTCCGCGTGCTCGCTTCGGCAGC<br>R, GTGCGTGTCGTGGAGTC       | 160                  |

**Supplementary figure 1.** Template DNA sequence of circRNA\_000203.

```
1 gtcagattatatttaaataattctgttttactttgcatttacacagggcctacttaaatt
61 aatgggtggccttacattgtttttaacaagtaaatgtgataataatcttccaccttt
121 gtcttaagcaggattgcttcacagtggagggagaagatttgaggcatgactttgaacgct
181 tacagttggccatggaaatggtaggatttcttcccaagacacgaagacagattttctctc
241 tgctctcagcaatactacatttgggtaatatctcatataaaaaagaagacctatcgggatg
301 actctattgataatctgtaatcctgaagtactaccattgtctcagaattattagaagtta
361 aagaagagatgctatgtgaagcattagttacaaggaagacggtgacagtgggagaaaagc
421 ttattttaccatataaaactggcagaggctgtgacagtgagaaactccatggctaagtctt
481 tatatagtgtctgtttgactggatagtgtttcgtattaatcatgcacttctgaatagta
541 aagatttggacaagataactaagactttgtccattgggttcttgatatttttgggtttg
601 aagattatgaaaacaatagttttgaacagttctgtattaattttgctaataaacgtttac
661 agcactacttttaatacagcatatctttaagttggagcaagaggaatatagaactgaaggta
721 tcagttggcataacatagattatattgataaatacttgttgcataaaatcttattagcaaaa
781 aaccaacaggactgctccatcttttggatgaagaaagcaactttccacaggctacaaacc
841 aaacattacttgacaagtttcaacatcaacatgaagagaattcttacattgaatttctg
901 ctgtgatggagcctgcttttatcataaaacattatgctggaaaagtaaaatatggagtaa
961 aggattttcgggaaaaaaatacagatcatatgctccagacattgtggctcttctgagaa
1021 gtagcaggaatgcttttgtttctgggatgactggcattgatcctgtagctgttttccgat
1081 gggcagttcttctgagcatttttcagagctgtggttgctttcaggaagctgggaaaagac
1141 atattcagagaaaaagtggacatgatgatacaacaccatgtgcgattttgaaaagtatgg
1201 atagtttttagctttctccaacaccagtcaccagaggagcttagagattctgcagaggt
1261 gcaaggaagagaagttacagtaaggctttaagtcctcttaacctgtattgtcacatctat
1321 ttggaaatggaaatcaagagtattcatgagggatgcatggagattgcataggaacatgcc
1381 tttcacaattctttatgcagactgtattgctt 1412
```
